# Supplementary material for: Effect of Hyperbaric Oxygen and Inflammation on Human Gingival Mesenchymal Stem/Progenitor Cells
Source: MDPI journal article supplement (doi:10.3390/cells12202479), 2023-10-18
Supplement: s1 [file s1]

## Supplements

**Suppl. Table S1.** Tissue donors.

| Patient | Gender | Age | Known Illnesses | Smoking |
|---------|--------|-----|-----------------|---------|
| 1       | ♂      | 37  | None            | No      |
| 2       | ♂      | 47  | None            | No      |
| 3       | ♂      | 23  | None            | No      |
| 4       | ♂      | 38  | None            | No      |
| 5       | ♀      | 24  | None            | No      |

**Suppl. Table S2.** Additional contrasts in DEA analyses.

| Effect of                                                                                    | Adjusted for con-<br>founder | N DE Genes | Top Genes | LFC (FDR P-Value) | Top KEGG Path-<br>way                            |
|----------------------------------------------------------------------------------------------|------------------------------|------------|-----------|-------------------|--------------------------------------------------|
| (1) Inflammation<br>medium<br>compared to<br>standard medium<br>without HBO<br>treatment 24h | donor                        | 760        | CLDN      | 4.63 (4.77e-09)   | Cytokine-<br>Cytokine<br>receptor<br>Interaction |
|                                                                                              |                              |            | SERPINB2  | 2.95 (3.53e-08)   |                                                  |
|                                                                                              |                              |            | TNFAIP3   | 3.64 (3.74e-08)   |                                                  |
| (2) Inflammation<br>medium<br>compared to<br>standard medium<br>without HBO<br>treatment 72h | donor                        | 741        | COLEC10   | -2.46 (1.33e-05)  | Cytokine-<br>Cytokine<br>receptor<br>Interaction |
|                                                                                              |                              |            | SLC7A2    | 2.73 (1.88e-05)   |                                                  |
|                                                                                              |                              |            | CD74      | 2.43 (2.17e-05)   |                                                  |

DE: differentially expressed; LFC: Log-Fold Change; FDR: False Discovery rate.

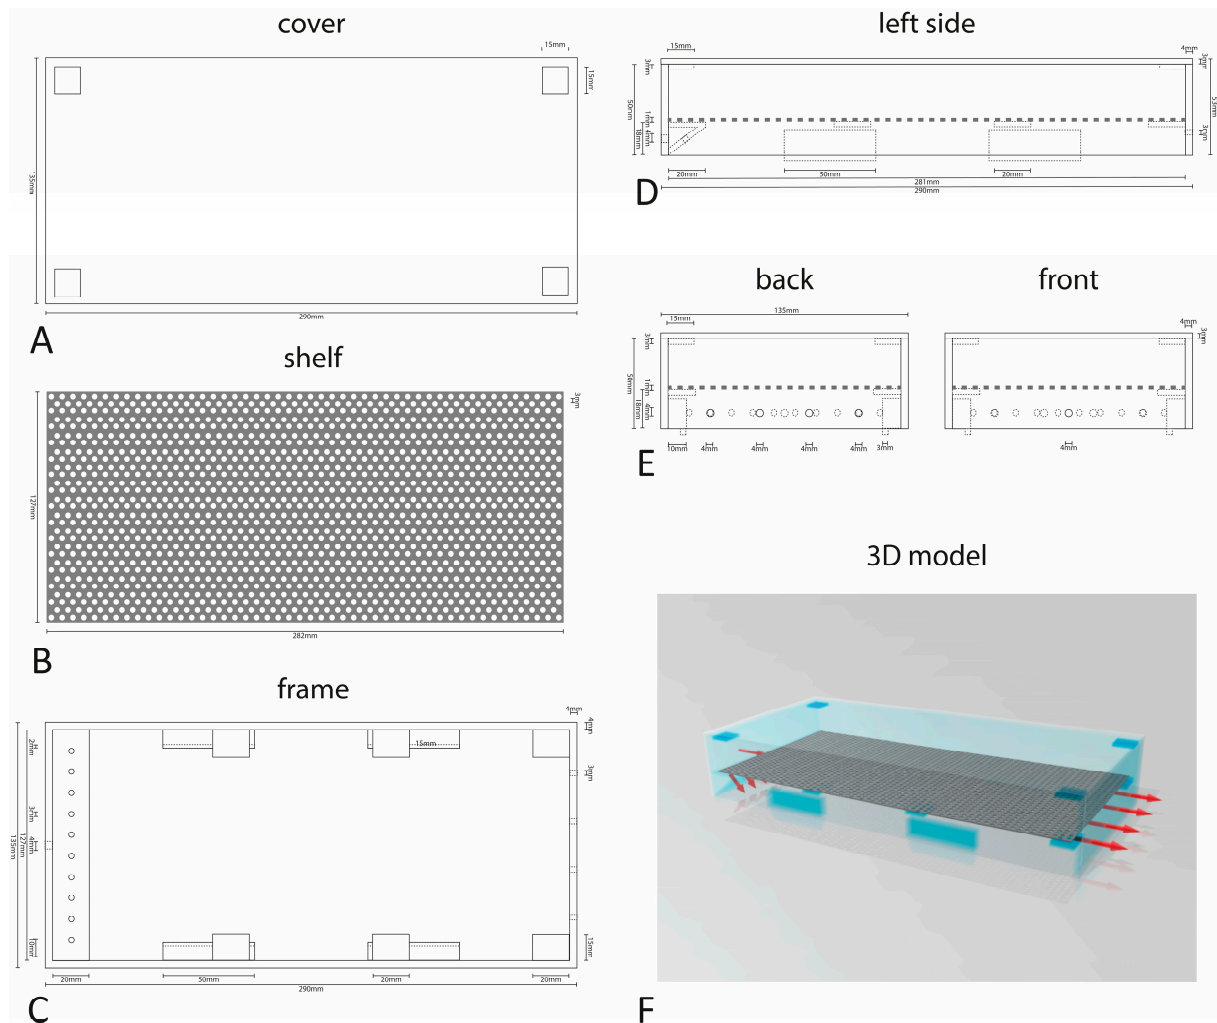

**Suppl. Figure S1. Experimental set-up in 6 to 24 well plate HBO stimulation.** High oxygen levels were achieved using an individually designed gas chamber. Cover (A) and frame (C) were made of acrylic glass; the shelf was cut out of a perforated metal plate. Assembled (D-E) Wells and petridishes were placed on the shelf and the frame was lowered into 37°C water, initiating constant stream of oxygen (F).

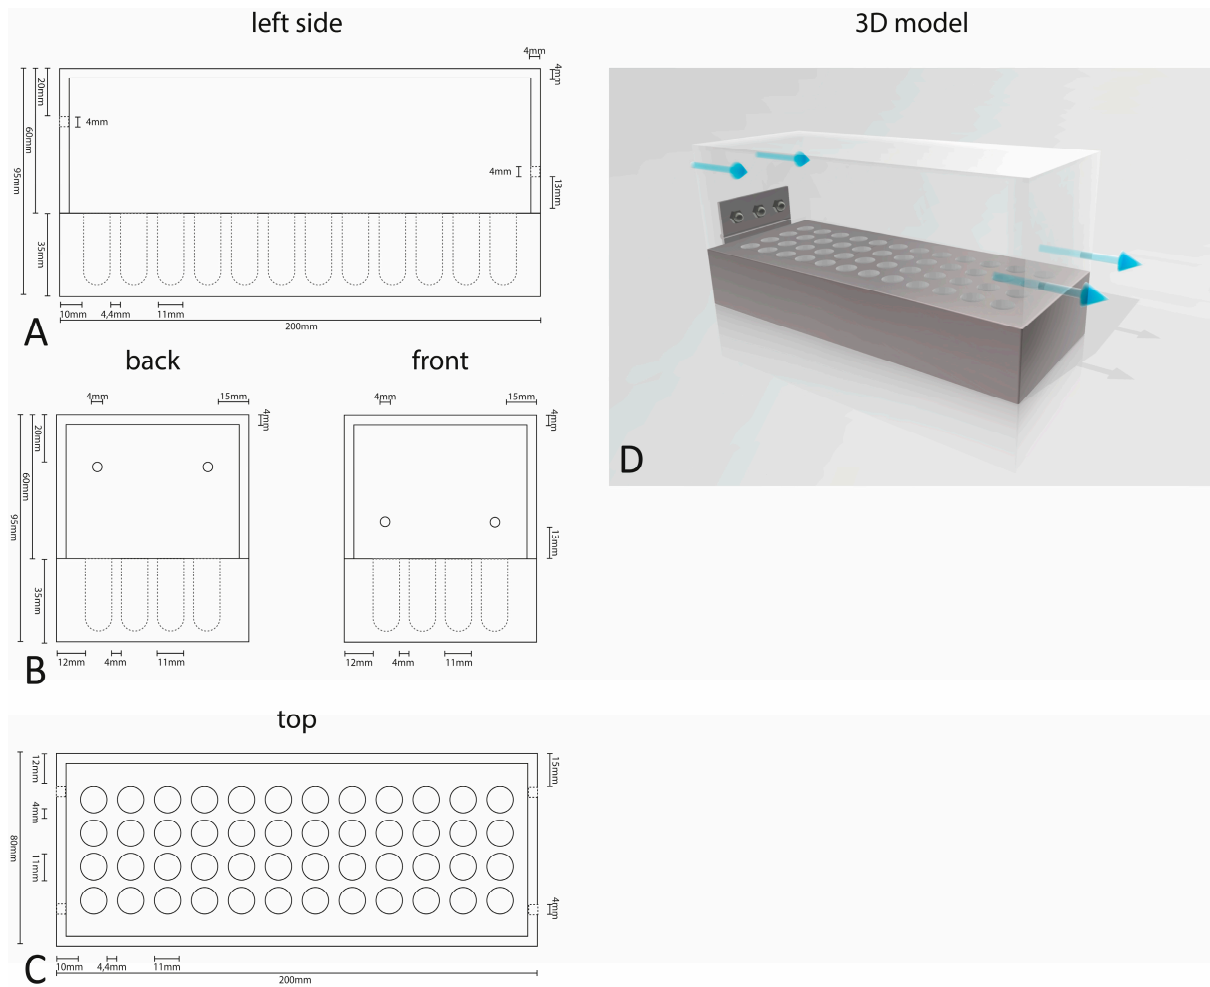

**Suppl. Figure S2. Experimental set-up in 1.5ml Eppendorf Tube HBO stimulation.** Oxygen supplement in chondrogenic differentiation required a specialized kind of chamber. The bottom was milled out of a bar of aluminum, the top, again, was made of acrylic glass (A-C). The bottom was placed in 37°C water during HBO stimulation (D).
